# Supplementary material for: The Effect of Metal Cations on the Aqueous Behavior of Dopamine. Thermodynamic Investigation of the Binary and Ternary Interactions with Cd2+, Cu2+ and UO22+ in NaCl at Different Ionic Strengths and Temperatures
Source: MDPI journal article supplement (doi:10.3390/molecules26247679), 2021-12-19
Supplement: s1 [file s1]

**Table S1.** Calculated formation constants<sup>a)</sup> of the Cd<sup>2+</sup>/Dop<sup>-</sup> species in NaCl aqueous solutions in molal concentration scale

| I/mol Kg <sup>-1</sup> | logβ <sub>ML</sub> | logβ <sub>MLH</sub> | logβ <sub>ML2</sub> |
|------------------------|--------------------|---------------------|---------------------|
| T = 288.15 K           |                    |                     |                     |
| 0.150                  | 6.65               | 14.89               | 11.61               |
| T = 298.15 K           |                    |                     |                     |
| 0.149                  | 6.48               | 14.08               | 10.88               |
| 0.494                  | 6.05               | 14.17               | 10.30               |
| 0.742                  | 6.40               | 14.70               | 10.34               |
| 0.976                  | 6.29               | 14.08               | 9.11                |
| T = 310.15 K           |                    |                     |                     |
| 0.150                  | 4.60               | 12.55               | 9.25                |

<sup>a)</sup> Refer to the general equilibrium: p M<sup>n+</sup> + q L<sup>z-</sup> + r H<sup>+</sup> = M<sub>p</sub>L<sub>q</sub>H<sub>r</sub>(np-zq+r).

**Table S2.** Calculated formation constants<sup>a)</sup> of the Cu<sup>2+</sup>/Dop<sup>-</sup> species in NaCl aqueous solutions in molal concentration scale

| <i>I</i> /mol kg <sup>-1</sup> | logβ <sub>ML2</sub> | logβ <sub>M2L</sub> | logβ <sub>M2L2</sub> | logβ <sub>M2L2(OH)2</sub> | logβ <sub>M2L(OH)</sub> | logβ <sub>ML2(OH)</sub> |
|--------------------------------|---------------------|---------------------|----------------------|---------------------------|-------------------------|-------------------------|
| T = 288.15 K                   |                     |                     |                      |                           |                         |                         |
| 0.162                          | 21.02               | 15.21               | 27.33                | 13.40                     | 8.87                    | 11.38                   |
| 0.496                          | 20.49               | 15.32               | 26.85                | 12.67                     | 9.02                    | 11.24                   |
| 0.753                          | 20.20               | 15.41               | 26.59                | 12.26                     | 9.20                    | 11.21                   |
| 1.013                          | 19.94               | 15.50               | 26.35                | 11.88                     | 9.41                    | 11.20                   |
| T = 298.15 K                   |                     |                     |                      |                           |                         |                         |
| 0.172                          | 19.35               | 14.57               | 25.66                | 11.72                     | 8.86                    | 11.01                   |
| 0.480                          | 18.87               | 14.68               | 25.20                | 11.04                     | 9.00                    | 10.88                   |
| 0.750                          | 18.55               | 14.77               | 24.92                | 10.60                     | 9.19                    | 10.84                   |
| 0.985                          | 18.31               | 14.85               | 24.71                | 10.26                     | 9.37                    | 10.83                   |
| T = 310.15 K                   |                     |                     |                      |                           |                         |                         |
| 0.146                          | 17.58               | 13.84               | 23.86                | 9.94                      | 8.85                    | 10.62                   |
| 0.490                          | 17.01               | 13.96               | 23.33                | 9.16                      | 8.98                    | 10.46                   |
| 0.743                          | 16.71               | 14.05               | 23.06                | 8.73                      | 9.15                    | 10.42                   |
| 1.008                          | 16.44               | 14.14               | 22.82                | 8.35                      | 9.36                    | 10.40                   |
| T = 318.15 K                   |                     |                     |                      |                           |                         |                         |
| 0.163                          | 16.39               | 13.40               | 22.66                | 8.73                      | 8.84                    |                         |
| 0.515                          | 15.81               | 13.52               | 22.12                | 7.93                      | 8.98                    | 10.18                   |
| 0.750                          | 15.54               | 13.60               | 21.88                | 7.54                      |                         |                         |
| 1.024                          | 15.26               | 13.69               | 21.62                | 7.14                      | 9.34                    | 10.13                   |

<sup>a)</sup> Refer to the general equilibrium:  $p \text{ M}^{n+} + q \text{ L}^{z-} + r \text{ H}^+ = \text{M}_p\text{L}_q\text{H}_r(\text{np}-\text{zq}+\text{r})$ .

**Table S3.** Calculated formation constants of the  $\text{UO}_2^{2+}/\text{Dop}^-$  species in NaCl aqueous solutions at different ionic strengths and temperatures, in molar concentration scale

| $I/\text{mol kg}^{-1}$                   | $\log\beta_{\text{ML}_2}^{\text{a)}$ | $\log\beta_{\text{MLAc}}^{\text{a)}$ | $\log\beta_{\text{MLOH}}^{\text{a)}$ |
|------------------------------------------|--------------------------------------|--------------------------------------|--------------------------------------|
| <b><math>T = 288.15 \text{ K}</math></b> |                                      |                                      |                                      |
| 0.162                                    | 21.50                                | 16.10                                | 6.66                                 |
| 0.531                                    | 21.87                                | 15.87                                | 6.71                                 |
| 0.752                                    | 22.24                                | 15.82                                | 6.83                                 |
| 1.012                                    | 22.65                                | 15.80                                | 6.96                                 |
| <b><math>T = 298.15 \text{ K}</math></b> |                                      |                                      |                                      |
| 0.166                                    | 21.68                                | 16.13                                | 7.09                                 |
| 0.510                                    | 21.34                                | 15.65                                | 6.83                                 |
| 0.752                                    | 21.21                                | 15.42                                | 6.73                                 |
| 1.013                                    | 21.12                                | 15.23                                | 6.64                                 |
| <b><math>T = 310.15 \text{ K}</math></b> |                                      |                                      |                                      |
| 0.162                                    | 22.14                                | 16.57                                | 7.48                                 |
| 0.513                                    | 21.86                                | 16.26                                | 7.29                                 |
| 0.754                                    | 21.78                                | 16.15                                | 7.23                                 |
| 1.016                                    | 21.72                                | 16.07                                | 7.20                                 |
| <b><math>T = 318.15 \text{ K}</math></b> |                                      |                                      |                                      |
| 0.161                                    | 22.11                                | 17.21                                | 7.49                                 |
| 0.512                                    | 21.96                                | 16.79                                | 7.51                                 |
| 0.757                                    | 21.96                                | 16.60                                | 7.60                                 |
| 1.018                                    | 21.99                                | 16.45                                | 7.71                                 |

<sup>a)</sup> Refer to the general equilibria:  $p \text{ M}^{n+} + q \text{ L}^{z-} + r \text{ H}^+ = \text{M}_p\text{L}_q\text{H}_r(\text{np}-\text{zq}+\text{r})$  and  $p \text{ M}^{n+} + q \text{ L}^{z-} + r \text{ H}^+ + \text{Ac}^- = \text{M}_p\text{L}_q\text{H}_r\text{Ac}(\text{np}-\text{zq}+\text{r}-1)$ .

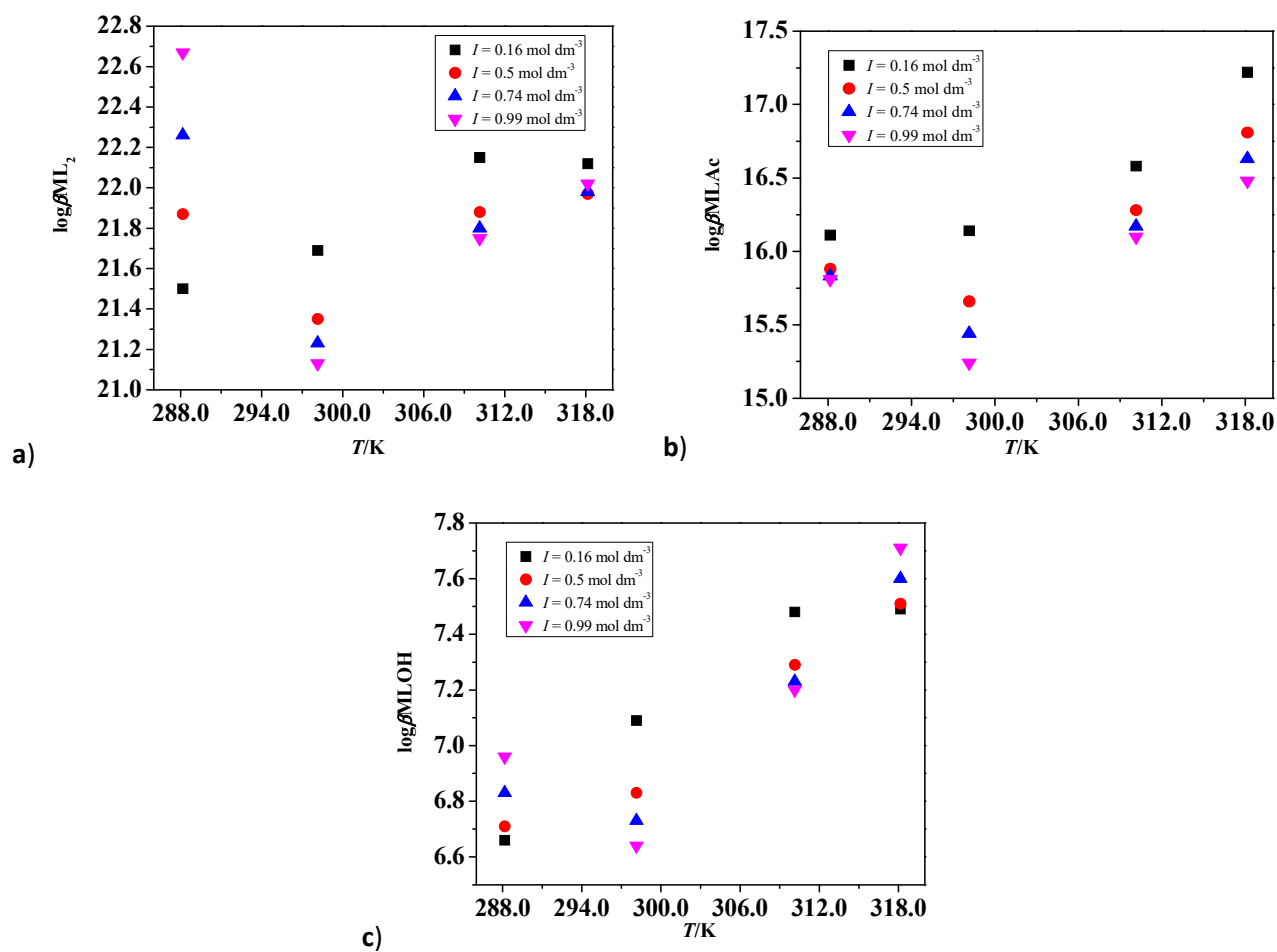

**Figure S1.** Trend of the experimental formation constants of the  $UO_2^{2+}/Dop^-$  complex species, at different temperature and ionic strength values: a)  $ML_2$ ; b)  $MLAc$ ; c)  $MLOH$

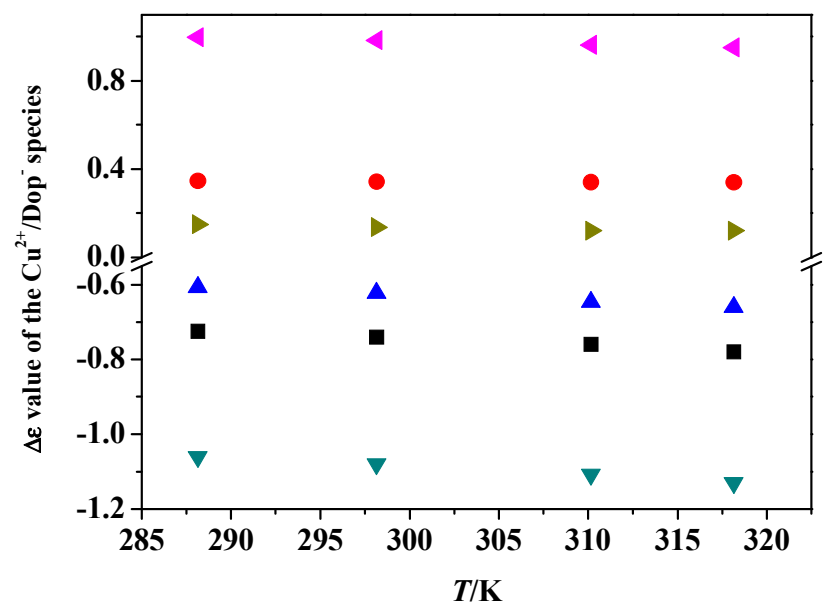

Figure S2. trend of the  $\Delta\epsilon$  values of the  $\text{Cu}^{2+}/\text{Dop}^-$  species vs  $T/\text{K}$ .

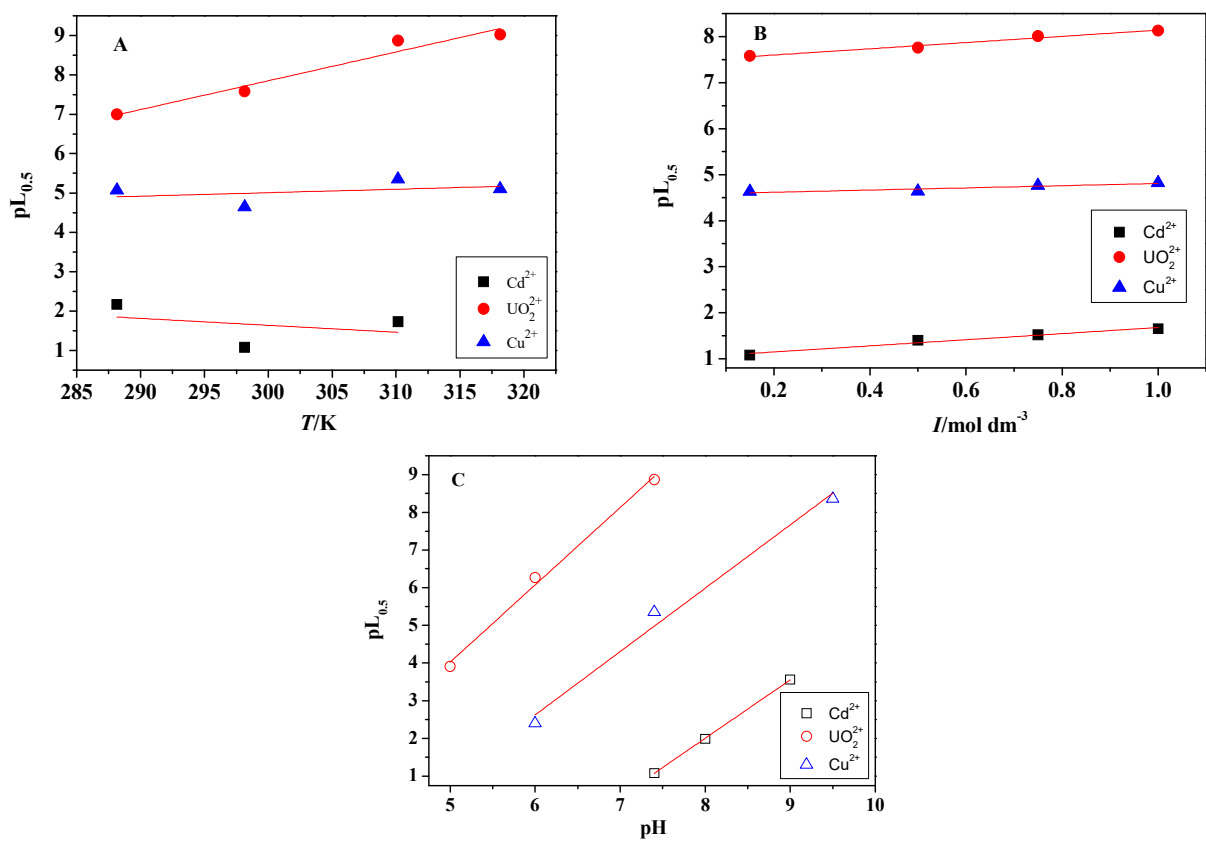

**Figure S3.** Trend of pL<sub>0.5</sub> vs A) T/K, B) I/mol dm<sup>-3</sup> and C) pH.
